# Supplementary material for: Developing a Sustainable Antimicrobial Stewardship (AMS) Programme in Ghana: Replicating the Scottish Triad Model of Information, Education and Quality Improvement
Source: Antibiotics (Basel). 2020 Sep 23;9(10):636. doi: 10.3390/antibiotics9100636 (PMC7598579; doi:10.3390/antibiotics9100636)
Supplement: Supplementary file 1 [file antibiotics-09-00636-s001.pdf]

## Supplementary Materials

**Figure S1.** Antimicrobial stewardship training plan—Ghana 2019

Training detailed below to be delivered on Day 1 and repeated on Day 2 to a multi-professional group of 10-15 participants each day. On Day 3, teams will come together to agree next steps, undertake informal behaviour training and project planning

| Time          | Session                         | Content                                                                                                                               | Format           |
|---------------|---------------------------------|---------------------------------------------------------------------------------------------------------------------------------------|------------------|
| 9.00–9.10     | Welcome and introductions       | Lead partners explain aims of the day<br>Speakers and hospital staff introduce themselves                                             | Lecture          |
| 9.10–9.30     | Antimicrobial resistance (AMR)  | What is AMR and why is it important<br>WHO and Ghana action plans                                                                     | Lecture          |
| 9.30–9.50     | Antimicrobial stewardship (AMS) | What is AMS and how can it help us tackle AMR<br>Getting started with AMS in your hospital and adopting a multi-professional approach | Lecture          |
| 9.50–10.20    | Antibiotic use data             | Importance of measuring antibiotic use<br>African Perspective<br>Keta PPS results May 2019                                            | Lecture          |
| 10.20–10.40   | Common infections               | What are common infections, what bacteria cause them and how should they be treated                                                   | Lecture          |
| 10.40–10.50   | Antibiotic guidelines           | The importance of guidelines<br>Ghana Standard Treatment Guidelines                                                                   | Lecture          |
| 10.50–11.10   | Everyone has a role to play     | Roles in AMS :<br>Prescribers / Pharmacists/ Nurses / Lab Staff<br>Nurse focus                                                        | Lecture          |
| 11.45–12.45   | Case studies                    | Using antibiotics in hospital practice<br>Includes group feedback for each case                                                       | Group discussion |
| 12.45–13.15   | Skills Practise                 | Practise interventions to challenge non-compliance with policy                                                                        | All              |
| 13.15 - 13.45 | Group Discussion                | What can we do to improve antimicrobial stewardship in our hospital?<br>Agree main points for meeting on Thursday                     | discussion       |
| 13.45–13.55   | Q & A                           | Opportunity to raise queries with speakers                                                                                            | Discussion       |
| 13.55–14.00   | Closing remarks                 | Summary and reflections on the day                                                                                                    | Lecture          |

Day 3: How to put some of the ideas and action plan into practice: Behaviour change and QI project planning

|            |                    |                                                                                |                                |            |
|------------|--------------------|--------------------------------------------------------------------------------|--------------------------------|------------|
| 9.00-10.00 | Whole team meeting | Feedback from teams on training session and action plan of key areas to tackle | Core Improvement Group to lead | Discussion |
|------------|--------------------|--------------------------------------------------------------------------------|--------------------------------|------------|

|              |                   |                                     |                        |                      |
|--------------|-------------------|-------------------------------------|------------------------|----------------------|
| 10.00- 10.30 | Behaviour Session | COM- B model and other useful tools | Change Xchange         | Interactive teaching |
| 10.30- 12.00 | Project Planning  |                                     | Core Improvement Group | Discussion           |

**Figure S2.** Ghana Police Hospital AMS Action Plan— 2019/2020

### Short-term plans

| ACTIONS                                                                            | TIMESCALES                     |
|------------------------------------------------------------------------------------|--------------------------------|
| Laboratory antimicrobial susceptibility surveillance–retrospective data collection | Jan 2020                       |
| Completion of guidelines for surgical/maternity unit                               | Dec 2019                       |
| Cascading of training of AMS to staff                                              | Jan 2019                       |
| Routine collection of antimicrobial prescribing at Pharmacy/Ward                   | Starts Dec 2019                |
| Conduct PPS survey                                                                 | 10 <sup>th</sup> February 2020 |

### Mid-term–Long term plans

| ACTIONS                                                                                                   | TIMESCALES            |
|-----------------------------------------------------------------------------------------------------------|-----------------------|
| Monthly AMS meetings                                                                                      | ongoing               |
| Laboratory antimicrobial susceptibility surveillance-prospective quarterly data collection                | Starts in Jan 2020    |
| Routine collection and analysis of antimicrobial prescribing at Pharmacy/Ward                             | June 2020             |
| Presentation of hospital PPS study results (2019 and interventions made) at Clinical Meeting (March 2020) | March 2020            |
| Cascading of training of AMS to staff                                                                     | Jan 2019              |
| Share findings of PPS results with DDTC                                                                   | May-June 2020         |
| Establishment of AMS monitoring team at wards/Pharmacy                                                    | June 2020             |
| Patients sensitization on AMR and prudent use of antimicrobials                                           | Nov 2020              |
| Presentation of hospital AMS and PPS results (Feb 2020) at Clinical Meeting/Hospital Management           | October–November 2020 |
| Routine collection and analysis of antimicrobial prescribing at Pharmacy/wards                            | December 2020         |
| Submit analysed results of routine antimicrobial prescribing and use patterns for publication             | December 2020         |

**Figure S3.** Updated Action plan Keta Hospital (Feb 2020)

| Code         | Action                                                                                                                        | Next Steps                                                                                                                                                                                                            | Actions taken (up to Feb 2020)                                                                                                                                                                                                 |
|--------------|-------------------------------------------------------------------------------------------------------------------------------|-----------------------------------------------------------------------------------------------------------------------------------------------------------------------------------------------------------------------|--------------------------------------------------------------------------------------------------------------------------------------------------------------------------------------------------------------------------------|
| <b>Green</b> | Train all prescribers and clinical staff                                                                                      | <ul style="list-style-type: none"> <li>Abbreviated content</li> <li>Identify and delegate presenter</li> <li>Identify opportunities</li> <li>List of attendees</li> </ul>                                             | Achieved<br>118 additional staff trained, ongoing training will continue                                                                                                                                                       |
| <b>Green</b> | Ensure all staff can access the guideline                                                                                     | <ul style="list-style-type: none"> <li>Access to app as part of training</li> <li>Encourage staff to download</li> <li>Summary of common infection posters</li> <li>Downloaded version to PCs</li> </ul>              | Achieved<br>Additional App training given<br>Posters with treatment guidelines now available in all clinical areas                                                                                                             |
| <b>Green</b> | Educate Patients about using antibiotics and about the need for staff to access guidelines on their phone                     | <ul style="list-style-type: none"> <li>Posters</li> <li>Videos</li> <li>Infographic on how to download</li> <li>WHO website</li> <li>Other languages</li> <li>Leaflets with key messages for conversations</li> </ul> | In progress<br>2x education sessions in OPD<br>Education in diabetes and Hypertension Clinic                                                                                                                                   |
| <b>Green</b> | Promote teamwork to support AMS                                                                                               | <ul style="list-style-type: none"> <li>Friday meetings</li> <li>Socialising</li> <li>AMT plan</li> </ul>                                                                                                              | In progress<br>AMT meetings started and teams working at ward level and across hospital on AMR                                                                                                                                 |
| <b>Green</b> | Develop process to encourage staff to check prescriptions against the guideline and query any prescription that doesn't match | <ul style="list-style-type: none"> <li>Standardisation</li> <li>Measurement</li> <li>Raise at ward rounds</li> <li>Feedback from using the app</li> </ul>                                                             | In progress<br>Poster guidelines are now in all clinical areas to facilitate discussion                                                                                                                                        |
| <b>Amber</b> | Develop surgical guidelines                                                                                                   | <ul style="list-style-type: none"> <li>Anaesthetist</li> <li>Work with GPH</li> <li>Evidence review and discussion</li> </ul>                                                                                         | Not started                                                                                                                                                                                                                    |
| <b>Amber</b> | Gaps in guidelines and local development/ adaptation of policy                                                                | <ul style="list-style-type: none"> <li>PPS data</li> <li>Identify gaps</li> <li>Guidelines team</li> </ul>                                                                                                            | In progress<br>2 <sup>nd</sup> pps completed<br>AMT considering gaps identified by PPS: Paediatric guidelines, Obs and Gyn Surgery, Sepsis, UTI vs STI, General Surgical<br>QI project compliance with pneumonia policy in OPD |
| <b>Amber</b> | Spreading message of AMS via local community e.g. churches and local radio station                                            | <ul style="list-style-type: none"> <li>Engage Reverends and identify key people in community</li> <li>Public health</li> <li>Local radio contacts</li> </ul>                                                          | Not started                                                                                                                                                                                                                    |
| <b>Red</b>   | Establish microbiology testing                                                                                                | <ul style="list-style-type: none"> <li>Health economist modelling cost effectiveness</li> <li>National solution may be most likely</li> </ul>                                                                         | Not started                                                                                                                                                                                                                    |

**Green** = short term/easy to achieve; **Amber** = medium term/more difficult; **Red** = long term/difficult
